# Supplementary material for: Spatially Explicit Modeling of Anthropogenic Heat Intensity in Beijing Center Area: An Investigation of Driving Factors with Urban Spatial Forms
Source: MDPI journal article supplement (doi:10.3390/s23177608), 2023-09-01
Supplement: s1 [file s1]

# Spatially Explicit Modeling of Anthropogenic Heat Intensity in Beijing Center Area: An Investigation of Driving Factors with Urban Spatial Forms

Meizi Yang <sup>1,2</sup>, Shisong Cao <sup>2</sup> and Dayu Zhang <sup>1,\*</sup>

<sup>1</sup> School of Architecture and Urban Planning, Beijing University of Civil Engineering and Architecture, Beijing 100044, China  
<sup>2</sup> School of Geomatics and Urban Spatial Informatics, Beijing University of Civil Engineering and Architecture, Beijing 100044, China.  
\* Correspondence: zhangdy@bucea.edu.cn

**Table S1.** Correlation analysis of AHF and urban form elements in functional zone A.

|     |                     | AHF     | BD       | BH       | FAR     | BV      | FC     | FD      | FVC      | AIA     |
|-----|---------------------|---------|----------|----------|---------|---------|--------|---------|----------|---------|
| AHF | Pearson Correlation | 1       | 0.098**  | 0.293**  | 0.339** | 0.228** | 0.032  | 0.188** | −0.267** | 0.241** |
|     | Sig. (2-tailed)     |         | 0.007    | 0.000    | 0.000   | 0.000   | 0.374  | 0.000   | 0.000    | 0.000   |
|     | N                   | 764     | 764      | 764      | 764     | 764     | 764    | 764     | 764      | 764     |
| BD  | Pearson Correlation | 0.098** | 1        | −0.130** | 0.547** | −0.059  | 0.019  | 0.298** | −0.621** | 0.531** |
|     | Sig. (2-tailed)     | 0.007   |          | 0.000    | 0.000   | 0.105   | 0.597  | 0.000   | 0.000    | 0.000   |
|     | N                   | 764     | 764      | 764      | 764     | 764     | 764    | 764     | 764      | 764     |
| BH  | Pearson Correlation | 0.293** | −0.130** | 1        | 0.563** | 0.605** | −0.019 | 0.097** | −0.054   | 0.065   |
|     | Sig. (2-tailed)     | 0.000   | 0.000    |          | 0.000   | 0.000   | 0.601  | 0.007   | 0.137    | 0.072   |
|     | N                   | 764     | 764      | 764      | 764     | 764     | 764    | 764     | 764      | 764     |
| FAR | Pearson Correlation | 0.339** | 0.547**  | 0.563**  | 1       | 0.467** | −0.008 | 0.360** | −0.492** | 0.488** |
|     | Sig. (2-tailed)     | 0.000   | 0.000    | 0.000    |         | 0.000   | 0.818  | 0.000   | 0.000    | 0.000   |

|            |                        |          |          |         |          |          |          |          |          |          |
|------------|------------------------|----------|----------|---------|----------|----------|----------|----------|----------|----------|
|            | N                      | 764      | 764      | 764     | 764      | 764      | 764      | 764      | 764      | 764      |
|            | Pearson<br>Correlation | 0.228**  | -0.059   | 0.605** | 0.467**  | 1        | -0.066   | 0.000    | -0.027   | -0.126** |
| <b>BV</b>  | Sig. (2-tailed)        | 0.000    | 0.000    | 0.000   | 0.000    |          | 0.611    | 0.004    | 0.504    | 0.000    |
|            | N                      | 719      | 719      | 719     | 719      | 719      | 719      | 719      | 719      | 719      |
|            | Pearson<br>Correlation | 0.009    | 0.198**  | 0.022   | 0.128**  | 0.019    | 1        | -0.326** | -0.193** | 0.200**  |
| <b>FC</b>  | Sig. (2-tailed)        | 0.818    | 0.000    | 0.557   | 0.001    | 0.611    |          | 0.000    | 0.000    | 0.000    |
|            | N                      | 719      | 719      | 719     | 719      | 719      | 719      | 719      | 719      | 719      |
|            | Pearson<br>Correlation | 0.172**  | 0.196**  | 0.140** | 0.291**  | 0.108**  | -0.326** | 1        | -0.149** | 0.260**  |
| <b>FD</b>  | Sig. (2-tailed)        | 0.000    | 0.000    | 0.000   | 0.000    | 0.004    | 0.000    |          | 0.000    | 0.000    |
|            | N                      | 719      | 719      | 719     | 719      | 719      | 719      | 719      | 719      | 719      |
|            | Pearson<br>Correlation | -0.110** | -0.588** | -0.001  | -0.386** | -0.025   | -0.193** | -0.149** | 1        | -0.606** |
| <b>FVC</b> | Sig. (2-tailed)        | 0.003    | 0.000    | 0.979   | 0.000    | 0.504    | 0.000    | 0.000    |          | 0.000    |
|            | N                      | 719      | 719      | 719     | 719      | 719      | 719      | 719      | 719      | 719      |
|            | Pearson<br>Correlation | 0.089*   | 0.547**  | 0.023   | 0.363**  | -0.162** | 0.200**  | 0.260**  | -0.606** | 1        |
| <b>AIA</b> | Sig. (2-tailed)        | 0.017    | 0.000    | 0.540   | 0.000    | 0.000    | 0.000    | 0.000    | 0.000    |          |
|            | N                      | 719      | 719      | 719     | 719      | 719      | 719      | 719      | 719      | 719      |

\*\*. Correlation is significant at the 0.01 level (2-tailed).

|     |                     | AHF     | BD      | BH      | FAR     | BV      | FC      | FD       | FVC      | AIA     |
|-----|---------------------|---------|---------|---------|---------|---------|---------|----------|----------|---------|
| AHF | Pearson Correlation | 1       | 0.148** | 0.360** | 0.498** | 0.223** | 0.033   | 0.376**  | −0.210** | 0.293** |
|     | Sig. (2-tailed)     |         | 0.000   | 0.000   | 0.000   | 0.000   | 0.287   | 0.000    | 0.000    | 0.000   |
|     | N                   | 1072    | 1072    | 1072    | 1072    | 1072    | 1072    | 1072     | 1072     | 1072    |
| BD  | Pearson Correlation | 0.148** | 1       | −0.013  | 0.558** | 0.063*  | 0.183** | 0.178**  | −0.445** | 0.439** |
|     | Sig. (2-tailed)     | 0.000   |         | 0.664   | 0.000   | 0.040   | 0.000   | 0.000    | 0.000    | 0.000   |
|     | N                   | 1072    | 1072    | 1072    | 1072    | 1072    | 1072    | 1072     | 1072     | 1072    |
| BH  | Pearson Correlation | 0.360** | −0.013  | 1       | 0.608** | 0.442** | 0.072*  | 0.371**  | −0.131** | 0.244** |
|     | Sig. (2-tailed)     | 0.000   | 0.664   |         | 0.000   | 0.000   | 0.019   | 0.000    | 0.000    | 0.000   |
|     | N                   | 1072    | 1072    | 1072    | 1072    | 1072    | 1072    | 1072     | 1072     | 1072    |
| FAR | Pearson Correlation | 0.498** | 0.558** | 0.608** | 1       | 0.400** | 0.204** | 0.414**  | −0.363** | 0.484** |
|     | Sig. (2-tailed)     | 0.000   | 0.000   | 0.000   |         | 0.000   | 0.000   | 0.000    | 0.000    | 0.000   |
|     | N                   | 1072    | 1072    | 1072    | 1072    | 1072    | 1072    | 1072     | 1072     | 1072    |
| BV  | Pearson Correlation | 0.223** | 0.063*  | 0.442** | 0.400** | 1       | 0.020   | 0.055    | −0.095** | −0.068* |
|     | Sig. (2-tailed)     | 0.000   | 0.040   | 0.000   | 0.000   |         | 0.512   | 0.071    | 0.002    | 0.026   |
|     | N                   | 1072    | 1072    | 1072    | 1072    | 1072    | 1072    | 1072     | 1072     | 1072    |
| FC  | Pearson Correlation | 0.033   | 0.183** | 0.072*  | 0.204** | 0.020   | 1       | −0.257** | −0.222** | 0.225** |

[illegible]

|            |                        |          |          |         |          |         |          |          |          |          |
|------------|------------------------|----------|----------|---------|----------|---------|----------|----------|----------|----------|
|            | N                      | 719      | 719      | 719     | 719      | 719     | 719      | 719      | 719      | 719      |
|            | Pearson<br>Correlation | 0.185**  | -0.170** | 1       | 0.647**  | 0.687** | 0.022    | 0.140**  | -0.001   | 0.023    |
| <b>BH</b>  | Sig. (2-tailed)        | 0.000    | 0.000    |         | 0.000    | 0.000   | 0.557    | 0.000    | 0.979    | 0.540    |
|            | N                      | 719      | 719      | 719     | 719      | 719     | 719      | 719      | 719      | 719      |
|            | Pearson<br>Correlation | 0.188**  | 0.453**  | 0.647** | 1        | 0.594** | 0.128**  | 0.291**  | -0.386** | 0.363**  |
| <b>FAR</b> | Sig. (2-tailed)        | 0.000    | 0.000    | 0.000   |          | 0.000   | 0.001    | 0.000    | 0.000    | 0.000    |
|            | N                      | 719      | 719      | 719     | 719      | 719     | 719      | 719      | 719      | 719      |
|            | Pearson<br>Correlation | 0.276**  | -0.148** | 0.687** | 0.594**  | 1       | 0.019    | 0.108**  | -0.025   | -0.162** |
| <b>BV</b>  | Sig. (2-tailed)        | 0.000    | 0.000    | 0.000   | 0.000    |         | 0.611    | 0.004    | 0.504    | 0.000    |
|            | N                      | 719      | 719      | 719     | 719      | 719     | 719      | 719      | 719      | 719      |
|            | Pearson<br>Correlation | 0.009    | 0.198**  | 0.022   | 0.128**  | 0.019   | 1        | -0.326** | -0.193** | 0.200**  |
| <b>FC</b>  | Sig. (2-tailed)        | 0.818    | 0.000    | 0.557   | 0.001    | 0.611   |          | 0.000    | 0.000    | 0.000    |
|            | N                      | 719      | 719      | 719     | 719      | 719     | 719      | 719      | 719      | 719      |
|            | Pearson<br>Correlation | 0.172**  | 0.196**  | 0.140** | 0.291**  | 0.108** | -0.326** | 1        | -0.149** | 0.260**  |
| <b>FD</b>  | Sig. (2-tailed)        | 0.000    | 0.000    | 0.000   | 0.000    | 0.004   | 0.000    |          | 0.000    | 0.000    |
|            | N                      | 719      | 719      | 719     | 719      | 719     | 719      | 719      | 719      | 719      |
|            | Pearson<br>Correlation | -0.110** | -0.588** | -0.001  | -0.386** | -0.025  | -0.193** | -0.149** | 1        | -0.606** |
| <b>FVC</b> | Sig. (2-tailed)        | 0.003    | 0.000    | 0.979   | 0.000    | 0.504   | 0.000    | 0.000    |          | 0.000    |

|                                                              |                        |        |         |       |         |          |         |         |          |     |
|--------------------------------------------------------------|------------------------|--------|---------|-------|---------|----------|---------|---------|----------|-----|
|                                                              | N                      | 719    | 719     | 719   | 719     | 719      | 719     | 719     | 719      | 719 |
|                                                              | Pearson<br>Correlation | 0.089* | 0.547** | 0.023 | 0.363** | −0.162** | 0.200** | 0.260** | −0.606** | 1   |
| <b>AIA</b>                                                   | Sig. (2-tailed)        | 0.017  | 0.000   | 0.540 | 0.000   | 0.000    | 0.000   | 0.000   | 0.000    |     |
|                                                              | N                      | 719    | 719     | 719   | 719     | 719      | 719     | 719     | 719      | 719 |
| **. Correlation is significant at the 0.01 level (2-tailed). |                        |        |         |       |         |          |         |         |          |     |
| *. Correlation is significant at the 0.05 level (2-tailed).  |                        |        |         |       |         |          |         |         |          |     |

**Table S4.** Correlation analysis of AHF and urban form elements in functional zone G.

|            |                        | AHF     | BD      | BH      | FAR     | BV      | FC      | FD      | FVC      | AIA     |
|------------|------------------------|---------|---------|---------|---------|---------|---------|---------|----------|---------|
|            | Pearson<br>Correlation | 1       | 0.424** | 0.354** | 0.428** | 0.134** | 0.340** | 0.288** | −0.522** | 0.537** |
| <b>AHF</b> | Sig. (2-tailed)        |         | 0.000   | 0.000   | 0.000   | 0.000   | 0.000   | 0.000   | 0.000    | 0.000   |
|            | N                      | 1798    | 1798    | 1798    | 1798    | 1798    | 1798    | 1798    | 1798     | 1798    |
|            | Pearson<br>Correlation | 0.424** | 1       | 0.298** | 0.846** | 0.106** | 0.323** | 0.330** | −0.526** | 0.636** |
| <b>BD</b>  | Sig. (2-tailed)        | 0.000   |         | 0.000   | 0.000   | 0.000   | 0.000   | 0.000   | 0.000    | 0.000   |
|            | N                      | 1798    | 1798    | 1798    | 1798    | 1798    | 1798    | 1798    | 1798     | 1798    |
|            | Pearson<br>Correlation | 0.354** | 0.298** | 1       | 0.500** | 0.585** | 0.233** | 0.102** | −0.349** | 0.350** |
| <b>BH</b>  | Sig. (2-tailed)        | 0.000   | 0.000   |         | 0.000   | 0.000   | 0.000   | 0.000   | 0.000    | 0.000   |
|            | N                      | 1798    | 1798    | 1798    | 1798    | 1798    | 1798    | 1798    | 1798     | 1798    |
|            | Pearson<br>Correlation | 0.428** | 0.846** | 0.500** | 1       | 0.257** | 0.280** | 0.305** | −0.493** | 0.556** |
| <b>FAR</b> | Sig. (2-tailed)        | 0.000   | 0.000   | 0.000   |         | 0.000   | 0.000   | 0.000   | 0.000    | 0.000   |

|            |                 |          |          |          |          |          |          |          |          |          |
|------------|-----------------|----------|----------|----------|----------|----------|----------|----------|----------|----------|
|            | N               | 1798     | 1798     | 1798     | 1798     | 1798     | 1798     | 1798     | 1798     | 1798     |
| <b>BV</b>  | Pearson         | 0.134**  | 0.106**  | 0.585**  | 0.257**  | 1        | 0.039    | 0.015    | -0.157** | 0.131**  |
|            | Correlation     |          |          |          |          |          |          |          |          |          |
|            | Sig. (2-tailed) | 0.000    | 0.000    | 0.000    | 0.000    |          | 0.095    | 0.522    | 0.000    | 0.000    |
|            | N               | 1798     | 1798     | 1798     | 1798     | 1798     | 1798     | 1798     | 1798     | 1798     |
| <b>FC</b>  | Pearson         | 0.340**  | 0.323**  | 0.233**  | 0.280**  | 0.039    | 1        | 0.034    | -0.380** | 0.394**  |
|            | Correlation     |          |          |          |          |          |          |          |          |          |
|            | Sig. (2-tailed) | 0.000    | 0.000    | 0.000    | 0.000    | 0.095    |          | 0.147    | 0.000    | 0.000    |
|            | N               | 1798     | 1798     | 1798     | 1798     | 1798     | 1798     | 1798     | 1798     | 1798     |
| <b>FD</b>  | Pearson         | 0.288**  | 0.330**  | 0.102**  | 0.305**  | 0.015    | 0.034    | 1        | -0.250** | 0.282**  |
|            | Correlation     |          |          |          |          |          |          |          |          |          |
|            | Sig. (2-tailed) | 0.000    | 0.000    | 0.000    | 0.000    | 0.522    | 0.147    |          | 0.000    | 0.000    |
|            | N               | 1798     | 1798     | 1798     | 1798     | 1798     | 1798     | 1798     | 1798     | 1798     |
| <b>FVC</b> | Pearson         | -0.522** | -0.526** | -0.349** | -0.493** | -0.157** | -0.380** | -0.250** | 1        | -0.756** |
|            | Correlation     |          |          |          |          |          |          |          |          |          |
|            | Sig. (2-tailed) | 0.000    | 0.000    | 0.000    | 0.000    | 0.000    | 0.000    | 0.000    |          | 0.000    |
|            | N               | 1798     | 1798     | 1798     | 1798     | 1798     | 1798     | 1798     | 1798     | 1798     |
| <b>AIA</b> | Pearson         | 0.537**  | 0.636**  | 0.350**  | 0.556**  | 0.131**  | 0.394**  | 0.282**  | -0.756** | 1        |
|            | Correlation     |          |          |          |          |          |          |          |          |          |
|            | Sig. (2-tailed) | 0.000    | 0.000    | 0.000    | 0.000    | 0.000    | 0.000    | 0.000    | 0.000    |          |
|            | N               | 1798     | 1798     | 1798     | 1798     | 1798     | 1798     | 1798     | 1798     | 1798     |

\*\* . Correlation is significant at the 0.01 level (2-tailed).

\* . Correlation is significant at the 0.05 level (2-tailed).

|     |                     | AHF     | BD      | BH      | FAR     | BV      | FC      | FD      | FVC      | AIA     |
|-----|---------------------|---------|---------|---------|---------|---------|---------|---------|----------|---------|
| AHF | Pearson Correlation | 1       | 0.329** | 0.227** | 0.354** | 0.145** | 0.157** | 0.199** | -0.309** | 0.304** |
|     | Sig. (2-tailed)     |         | 0.000   | 0.000   | 0.000   | 0.000   | 0.000   | 0.000   | 0.000    | 0.000   |
|     | N                   | 755     | 755     | 755     | 755     | 755     | 755     | 755     | 755      | 755     |
| BD  | Pearson Correlation | 0.329** | 1       | 0.255** | 0.863** | 0.134** | 0.214** | 0.323** | -0.418** | 0.505** |
|     | Sig. (2-tailed)     | 0.000   |         | 0.000   | 0.000   | 0.000   | 0.000   | 0.000   | 0.000    | 0.000   |
|     | N                   | 755     | 755     | 755     | 755     | 755     | 755     | 755     | 755      | 755     |
| BH  | Pearson Correlation | 0.227** | 0.255** | 1       | 0.367** | 0.517** | 0.137** | 0.180** | -0.167** | 0.250** |
|     | Sig. (2-tailed)     | 0.000   | 0.000   |         | 0.000   | 0.000   | 0.000   | 0.000   | 0.000    | 0.000   |
|     | N                   | 755     | 755     | 755     | 755     | 755     | 755     | 755     | 755      | 755     |
| FAR | Pearson Correlation | 0.354** | 0.863** | 0.367** | 1       | 0.251** | 0.116** | 0.350** | -0.367** | 0.450** |
|     | Sig. (2-tailed)     | 0.000   | 0.000   | 0.000   |         | 0.000   | 0.001   | 0.000   | 0.000    | 0.000   |
|     | N                   | 755     | 755     | 755     | 755     | 755     | 755     | 755     | 755      | 755     |
| BV  | Pearson Correlation | 0.145** | 0.134** | 0.517** | 0.251** | 1       | -0.040  | 0.032   | -0.086*  | 0.060   |
|     | Sig. (2-tailed)     | 0.000   | 0.000   | 0.000   | 0.000   |         | 0.276   | 0.378   | 0.018    | 0.098   |
|     | N                   | 755     | 755     | 755     | 755     | 755     | 755     | 755     | 755      | 755     |
| FC  | Pearson Correlation | 0.157** | 0.214** | 0.137** | 0.116** | -0.040  | 1       | -0.014  | -0.174** | 0.230** |

|     |                     | AHF     | BD      | BH      | FAR     | BV      | FC      | FD      | FVC      | AIA     |
|-----|---------------------|---------|---------|---------|---------|---------|---------|---------|----------|---------|
| AHF | Pearson Correlation | 1       | 0.329** | 0.227** | 0.354** | 0.145** | 0.157** | 0.199** | -0.309** | 0.304** |
|     | Sig. (2-tailed)     |         | 0.000   | 0.000   | 0.000   | 0.000   | 0.000   | 0.000   | 0.000    | 0.000   |
|     | N                   | 755     | 755     | 755     | 755     | 755     | 755     | 755     | 755      | 755     |
| BD  | Pearson Correlation | 0.329** | 1       | 0.255** | 0.863** | 0.134** | 0.214** | 0.323** | -0.418** | 0.505** |
|     | Sig. (2-tailed)     | 0.000   |         | 0.000   | 0.000   | 0.000   | 0.000   | 0.000   | 0.000    | 0.000   |
|     | N                   | 755     | 755     | 755     | 755     | 755     | 755     | 755     | 755      | 755     |
| BH  | Pearson Correlation | 0.227** | 0.255** | 1       | 0.367** | 0.517** | 0.137** | 0.180** | -0.167** | 0.250** |
|     | Sig. (2-tailed)     | 0.000   | 0.000   |         | 0.000   | 0.000   | 0.000   | 0.000   | 0.000    | 0.000   |
|     | N                   | 755     | 755     | 755     | 755     | 755     | 755     | 755     | 755      | 755     |
| FAR | Pearson Correlation | 0.354** | 0.863** | 0.367** | 1       | 0.251** | 0.116** | 0.350** | -0.367** | 0.450** |
|     | Sig. (2-tailed)     | 0.000   | 0.000   | 0.000   |         | 0.000   | 0.001   | 0.000   | 0.000    | 0.000   |
|     | N                   | 755     | 755     | 755     | 755     | 755     | 755     | 755     | 755      | 755     |
| BV  | Pearson Correlation | 0.145** | 0.134** | 0.517** | 0.251** | 1       | -0.040  | 0.032   | -0.086*  | 0.060   |
|     | Sig. (2-tailed)     | 0.000   | 0.000   | 0.000   | 0.000   |         | 0.276   | 0.378   | 0.018    | 0.098   |
|     | N                   | 755     | 755     | 755     | 755     | 755     | 755     | 755     | 755      | 755     |
| FC  | Pearson Correlation | 0.157** | 0.214** | 0.137** | 0.116** | -0.040  | 1       | -0.014  | -0.174** | 0.230** |



|                                                              |                     |          |          |          |          |         |          |          |          |          |
|--------------------------------------------------------------|---------------------|----------|----------|----------|----------|---------|----------|----------|----------|----------|
|                                                              | Sig. (2-tailed)     | 0.000    | 0.000    | 0.000    | 0.001    | 0.276   |          | 0.704    | 0.000    | 0.000    |
|                                                              | N                   | 755      | 755      | 755      | 755      | 755     | 755      | 755      | 755      | 755      |
|                                                              | Pearson Correlation | 0.199**  | 0.323**  | 0.180**  | 0.350**  | 0.032   | −0.014   | 1        | −0.260** | 0.278**  |
| <b>FD</b>                                                    | Sig. (2-tailed)     | 0.000    | 0.000    | 0.000    | 0.000    | 0.378   | 0.704    |          | 0.000    | 0.000    |
|                                                              | N                   | 755      | 755      | 755      | 755      | 755     | 755      | 755      | 755      | 755      |
|                                                              | Pearson Correlation | −0.309** | −0.418** | −0.167** | −0.367** | −0.086* | −0.174** | −0.260** | 1        | −0.567** |
| <b>FVC</b>                                                   | Sig. (2-tailed)     | 0.000    | 0.000    | 0.000    | 0.000    | 0.018   | 0.000    | 0.000    |          | 0.000    |
|                                                              | N                   | 755      | 755      | 755      | 755      | 755     | 755      | 755      | 755      | 755      |
|                                                              | Pearson Correlation | 0.304**  | 0.505**  | 0.250**  | 0.450**  | 0.060   | 0.230**  | 0.278**  | −0.567** | 1        |
| <b>AIA</b>                                                   | Sig. (2-tailed)     | 0.000    | 0.000    | 0.000    | 0.000    | 0.098   | 0.000    | 0.000    | 0.000    |          |
|                                                              | N                   | 755      | 755      | 755      | 755      | 755     | 755      | 755      | 755      | 755      |
| **, Correlation is significant at the 0.01 level (2-tailed). |                     |          |          |          |          |         |          |          |          |          |
| *, Correlation is significant at the 0.05 level (2-tailed).  |                     |          |          |          |          |         |          |          |          |          |

**Table S6.** Correlation analysis of AHF and urban form elements in functional zone S.

|            |                     | <b>AHF</b> | <b>BD</b> | <b>BH</b> | <b>FAR</b> | <b>BV</b> | <b>FC</b> | <b>FD</b> | <b>FVC</b> | <b>AIA</b> |
|------------|---------------------|------------|-----------|-----------|------------|-----------|-----------|-----------|------------|------------|
|            | Pearson Correlation | 1          | 0.528**   | 0.009     | 0.567**    | 0.625**   | −0.409**  | 0.023     | −0.783**   | 0.589**    |
| <b>AHF</b> | Sig. (2-tailed)     |            | 0.000     | 0.940     | 0.000      | 0.000     | 0.000     | 0.851     | 0.000      | 0.000      |
|            | N                   | 72         | 72        | 72        | 72         | 72        | 72        | 72        | 72         | 72         |
| <b>BD</b>  | Pearson Correlation | 0.528**    | 1         | 0.136     | 0.903**    | 0.361**   | −0.109    | 0.251*    | −0.457**   | 0.488**    |

|            |                     |          |          |         |          |          |         |         |          |          |
|------------|---------------------|----------|----------|---------|----------|----------|---------|---------|----------|----------|
|            | Sig. (2-tailed)     | 0.000    |          | 0.254   | 0.000    | 0.002    | 0.363   | 0.033   | 0.000    | 0.000    |
|            | N                   | 72       | 72       | 72      | 72       | 72       | 72      | 72      | 72       | 72       |
|            | Pearson Correlation | 0.009    | 0.136    | 1       | 0.356**  | 0.195    | 0.219   | 0.467** | -0.167   | 0.256*   |
| <b>BH</b>  | Sig. (2-tailed)     | 0.940    | 0.254    |         | 0.002    | 0.101    | 0.064   | 0.000   | 0.160    | 0.030    |
|            | N                   | 72       | 72       | 72      | 72       | 72       | 72      | 72      | 72       | 72       |
|            | Pearson Correlation | 0.567**  | 0.903**  | 0.356** | 1        | 0.458**  | -0.109  | 0.520** | -0.498** | 0.490**  |
| <b>FAR</b> | Sig. (2-tailed)     | 0.000    | 0.000    | 0.002   |          | 0.000    | 0.363   | 0.000   | 0.000    | 0.000    |
|            | N                   | 72       | 72       | 72      | 72       | 72       | 72      | 72      | 72       | 72       |
|            | Pearson Correlation | 0.625**  | 0.361**  | 0.195   | 0.458**  | 1        | -0.185  | 0.041   | -0.377** | 0.275*   |
| <b>BV</b>  | Sig. (2-tailed)     | 0.000    | 0.002    | 0.101   | 0.000    |          | 0.119   | 0.735   | 0.001    | 0.020    |
|            | N                   | 72       | 72       | 72      | 72       | 72       | 72      | 72      | 72       | 72       |
|            | Pearson Correlation | -0.409** | -0.109   | 0.219   | -0.109   | -0.185   | 1       | 0.081   | 0.369**  | -0.199   |
| <b>FC</b>  | Sig. (2-tailed)     | 0.000    | 0.363    | 0.064   | 0.363    | 0.119    |         | 0.500   | 0.001    | 0.094    |
|            | N                   | 72       | 72       | 72      | 72       | 72       | 72      | 72      | 72       | 72       |
|            | Pearson Correlation | 0.023    | 0.251*   | 0.467** | 0.520**  | 0.041    | 0.081   | 1       | -0.188   | 0.242*   |
| <b>FD</b>  | Sig. (2-tailed)     | 0.851    | 0.033    | 0.000   | 0.000    | 0.735    | 0.500   |         | 0.115    | 0.040    |
|            | N                   | 72       | 72       | 72      | 72       | 72       | 72      | 72      | 72       | 72       |
|            | Pearson Correlation | -0.783** | -0.457** | -0.167  | -0.498** | -0.377** | 0.369** | -0.188  | 1        | -0.738** |
| <b>FVC</b> | Sig. (2-tailed)     | 0.000    | 0.000    | 0.160   | 0.000    | 0.001    | 0.001   | 0.115   |          | 0.000    |
|            | N                   | 72       | 72       | 72      | 72       | 72       | 72      | 72      | 72       | 72       |
| <b>AIA</b> | Pearson Correlation | 0.589**  | 0.488**  | 0.256*  | 0.490**  | 0.275*   | -0.199  | 0.242*  | -0.738** | 1        |

|                 |       |       |       |       |       |       |       |       |
|-----------------|-------|-------|-------|-------|-------|-------|-------|-------|
| Sig. (2-tailed) | 0.000 | 0.000 | 0.030 | 0.000 | 0.020 | 0.094 | 0.040 | 0.000 |
| N               | 72    | 72    | 72    | 72    | 72    | 72    | 72    | 72    |

\*\* . Correlation is significant at the 0.01 level (2-tailed).

\* . Correlation is significant at the 0.05 level (2-tailed).

**Table S7.** Multicollinearity test among urban form elements

|     | VIF   |       |       |       |       |       |
|-----|-------|-------|-------|-------|-------|-------|
|     | A     | B     | R     | G     | M     | S     |
| BD  | 2.877 | 2.268 | 3.202 | 4.692 | 4.576 | 5.664 |
| BH  | 2.644 | 2.408 | 3.344 | 2.120 | 1.589 | -     |
| FAR | 4.320 | 3.619 | 5.297 | 4.686 | 4.585 | 6.289 |
| BV  | 1.964 | 1.470 | 2.805 | 1.557 | 1.439 | 1.359 |
| FC  | -     | -     | -     | 1.258 | 1.136 | 1.191 |
| FD  | 1.238 | 1.349 | 1.132 | 1.157 | 1.201 | -     |
| FVC | 1.995 | 1.478 | 1.961 | 2.441 | 1.549 | 2.709 |
| AIA | 2.036 | 1.850 | 2.102 | 2.953 | 1.767 | 2.375 |

**Table S8.** Regression results and t test of urban form elements in functional zone A.

|            | Unstandardized |            | Standardized | t      | P        | VIF   | R <sup>2</sup> | Adjusted R <sup>2</sup> | F          |
|------------|----------------|------------|--------------|--------|----------|-------|----------------|-------------------------|------------|
|            | Coefficients   |            | Coefficients |        |          |       |                |                         |            |
|            | B              | Std. Error | Beta         |        |          |       |                |                         |            |
| (Constant) | 0.078          | 0.013      | 0            | 6.074  | 0.000*** | -     |                |                         | F=23.835   |
| BD         | -0.063         | 0.02       | -0.171       | -3.069 | 0.002*** | 2.877 | 0.181          | 0.173                   | P=0.000*** |

|     |        |       |        |        |          |       |
|-----|--------|-------|--------|--------|----------|-------|
| BH  | 0.037  | 0.019 | 0.105  | 1.947  | 0.052*   | 2.664 |
| FAR | 0.076  | 0.036 | 0.146  | 2.137  | 0.033**  | 4.32  |
| BV  | 0.684  | 0.327 | 0.096  | 2.091  | 0.037**  | 1.964 |
| FD  | 0.054  | 0.028 | 0.070  | 1.904  | 0.057*   | 1.238 |
| FVC | -0.074 | 0.017 | -0.200 | -4.291 | 0.000*** | 1.995 |
| AIA | 0.028  | 0.011 | 0.121  | 2.573  | 0.010**  | 2.036 |

Dependent variable: AHF

\*\*\*. Correlation is significant at the 0.01 level (2-tailed). \*\*. Correlation is significant at the 0.05 level (2-tailed). \*. Correlation is significant at the 0.1 level (2-tailed).

**Table S9.** Regression results and t test of urban form elements in functional zone B.

|            | Unstandardized |            | Standardized |  |        |          |       |                |                         |            |
|------------|----------------|------------|--------------|--|--------|----------|-------|----------------|-------------------------|------------|
|            | Coefficients   |            | Coefficients |  | t      | P        | VIF   | R <sup>2</sup> | Adjusted R <sup>2</sup> | F          |
|            | B              | Std. Error | Beta         |  |        |          |       |                |                         |            |
| (Constant) | 0.065          | 0.017      | -            |  | 3.827  | 0.000*** | -     |                |                         |            |
| BD         | -0.152         | 0.024      | -0.243       |  | -6.354 | 0.000*** | 2.268 |                |                         |            |
| BH         | -0.051         | 0.024      | -0.083       |  | -2.099 | 0.036**  | 2.408 |                |                         |            |
| FAR        | 0.361          | 0.033      | 0.532        |  | 11.019 | 0.000*** | 3.619 | 0.314          | 0.310                   | F=69.658   |
| BV         | 0.328          | 0.21       | 0.048        |  | 1.565  | 0.118    | 1.47  |                |                         | P=0.000*** |
| FD         | 0.157          | 0.024      | 0.194        |  | 6.591  | 0.000*** | 1.349 |                |                         |            |
| FVC        | -0.054         | 0.023      | -0.072       |  | -2.334 | 0.020**  | 1.478 |                |                         |            |
| AIA        | 0.026          | 0.017      | 0.054        |  | 1.57   | 0.117    | 1.85  |                |                         |            |

Dependent variable: AHF

\*\*\*. Correlation is significant at the 0.01 level (2-tailed). \*\*. Correlation is significant at the 0.05 level (2-tailed). \*. Correlation is significant at the 0.1 level (2-tailed).

**Table S10.** Regression results and t test of urban form elements in functional zone R.

|            | Unstandardized |               | Standardized | t      | P        | VIF   | R <sup>2</sup> | Adjusted<br>R <sup>2</sup> | F          |
|------------|----------------|---------------|--------------|--------|----------|-------|----------------|----------------------------|------------|
|            | Coefficients   |               | Coefficients |        |          |       |                |                            |            |
|            | B              | Std.<br>Error | Beta         |        |          |       |                |                            |            |
| (Constant) | 0.126          | 0.026         | -            | 4.902  | 0.000*** | -     |                |                            |            |
| BD         | -0.313         | 0.043         | -0.443       | -7.275 | 0.000*** | 3.202 |                |                            |            |
| BH         | -0.1           | 0.027         | -0.230       | -3.692 | 0.000*** | 3.344 |                |                            |            |
| FAR        | 0.167          | 0.053         | 0.246        | 3.141  | 0.002*** | 5.297 | 0.175          | 0.168                      | F=21.650   |
| BV         | 2.59           | 0.643         | 0.230        | 4.027  | 0.000*** | 2.805 |                |                            | P=0.000*** |
| FD         | 0.115          | 0.032         | 0.131        | 3.606  | 0.000*** | 1.132 |                |                            |            |
| FVC        | -0.097         | 0.03          | -0.155       | -3.26  | 0.001*** | 1.961 |                |                            |            |
| AIA        | 0.064          | 0.02          | 0.157        | 3.17   | 0.002*** | 2.102 |                |                            |            |

Dependent variable: AHF

\*\*\*. Correlation is significant at the 0.01 level (2-tailed). \*\*. Correlation is significant at the 0.05 level (2-tailed). \*. Correlation is significant at the 0.1 level (2-tailed).

**Table S11.** Regression results and t test of urban form elements in functional zone G.

|            | Unstandardized |               | Standardized | t      | P        | VIF   | R²    | Adjusted<br>R² | F          |
|------------|----------------|---------------|--------------|--------|----------|-------|-------|----------------|------------|
|            | Coefficients   |               | Coefficients |        |          |       |       |                |            |
|            | B              | Std.<br>Error | Beta         |        |          |       |       |                |            |
| (Constant) | 0.026          | 0.003         | 0            | 7.732  | 0.000*** | -     |       |                |            |
| BH         | 0.033          | 0.005         | 0.133        | 6.092  | 0.000*** | 1.374 |       |                |            |
| FAR        | 0.042          | 0.016         | 0.067        | 2.680  | 0.007*** | 1.798 |       |                |            |
| FC         | 0.014          | 0.002         | 0.125        | 6.059  | 0.000*** | 1.231 | 0.377 | 0.375          | F=180.909  |
| FD         | 0.106          | 0.015         | 0.139        | 6.982  | 0.000*** | 1.146 |       |                | P=0.000*** |
| AIA        | 0.024          | 0.003         | 0.216        | 7.053  | 0.000*** | 2.689 |       |                |            |
| FVC        | -0.027         | 0.004         | -0.197       | -6.767 | 0.000*** | 2.439 |       |                |            |

Dependent variable: AHF

\*\*\*. Correlation is significant at the 0.01 level (2-tailed). \*\*. Correlation is significant at the 0.05 level (2-tailed). \*. Correlation is significant at the 0.1 level (2-tailed).

**Table S12.** Regression results and t test of urban form elements in functional zone M.

|            | Unstandardized |            | Standardized |       |          |       |                |                         |            |
|------------|----------------|------------|--------------|-------|----------|-------|----------------|-------------------------|------------|
|            | Coefficients   |            | Coefficients | t     | P        | VIF   | R <sup>2</sup> | Adjusted R <sup>2</sup> | F          |
|            | B              | Std. Error | Beta         |       |          |       |                |                         |            |
| (Constant) | 0.031          | 0.003      | 0            | 9.640 | 0.000*** | -     |                |                         |            |
| BH         | 0.027          | 0.01       | 0.096        | 2.690 | 0.007*** | 1.168 | 0.178          | 0.174                   | F=40.735   |
| FAR        | 0.101          | 0.016      | 0.239        | 6.330 | 0.000*** | 1.301 |                |                         | P=0.000*** |

|     |        |       |        |        |          |       |
|-----|--------|-------|--------|--------|----------|-------|
| FC  | 0.008  | 0.003 | 0.082  | 2.436  | 0.015**  | 1.045 |
| FVC | -0.031 | 0.006 | -0.191 | -5.313 | 0.000*** | 1.181 |

Dependent variable: AHF

\*\*\*. Correlation is significant at the 0.01 level (2-tailed). \*\*. Correlation is significant at the 0.05 level (2-tailed). \*.  
Correlation is significant at the 0.1 level (2-tailed).

**Table S13.** Regression results and t test of urban form elements in functional zone S.

|            | Unstandardized |            | Standardized |        |          |       |                |                         |            |
|------------|----------------|------------|--------------|--------|----------|-------|----------------|-------------------------|------------|
|            | Coefficients   |            | Coefficients | t      | P        | VIF   | R <sup>2</sup> | Adjusted R <sup>2</sup> | F          |
|            | B              | Std. Error | Beta         |        |          |       |                |                         |            |
| (Constant) | 0.181          | 0.014      | 0            | 13.132 | 0.000*** | -     |                |                         |            |
| BV         | 0.264          | 0.045      | 0.385        | 5.807  | 0.000*** | 1.166 | 0.740          | 0.733                   | F=98.353   |
| FVC        | -0.239         | 0.025      | -0.638       | -9.633 | 0.000*** | 1.166 |                |                         | P=0.000*** |

Dependent variable: AHF

\*\*\*. Correlation is significant at the 0.01 level (2-tailed). \*\*. Correlation is significant at the 0.05 level (2-tailed). \*.  
Correlation is significant at the 0.1 level (2-tailed).
